# Supplementary material
Source: PubMed Central journal article supplement (PMC5079487)
Supplement: 10.3163.1536-5050.104.4.004.sg001.pdf [file 10.3163.1536-5050.104.4.004.sg001.pdf]

## Impact of librarians on reporting of the literature searching component of pediatric systematic reviews

Deborah Meert, MLIS; Nazi Torabi, MLIS; John Costella, DDS, MSc, MLIS

### APPENDIX A

#### Assessment instrument for scoring the systematic review articles

| Our element # | IOM element #  | Element's description                                                                                                                                                                                        | Yes reported on page | No or unclear |
|---------------|----------------|--------------------------------------------------------------------------------------------------------------------------------------------------------------------------------------------------------------|----------------------|---------------|
|               | 2.6.2          | Provide a replicable description of the search strategy and describe parameters for selection:                                                                                                               |                      |               |
| 1             |                | ▪ Years considered                                                                                                                                                                                           |                      |               |
| 2             | 2.6.4          | ▪ Reported selection criteria (e.g., study type, population/age, gender, geography, etc.)                                                                                                                    |                      |               |
| 3             |                | ▪ Visual tool(s) to describe study inclusion process                                                                                                                                                         |                      |               |
| 4             |                | ▪ the date last searched                                                                                                                                                                                     |                      |               |
| 5             | 3.4.1          | ▪ the keywords, subject headings, and search terms that were used                                                                                                                                            |                      |               |
| 6             | 3.1.2          | ▪ Reported the search strategy to address each key research question                                                                                                                                         |                      |               |
| 7             | 3.2.6          | Language restriction reported                                                                                                                                                                                |                      |               |
| 8             | 3.1.4          | Name selected bibliographic databases and citation indexes                                                                                                                                                   |                      |               |
| 9             | 3.1.8<br>3.1.9 | Includes rationale for type and number of databases selected, including subject-specific databases and regional bibliographic databases if standard databases are unlikely to provide all relevant evidence. |                      |               |
| 10            | 3.1.6          | Search literature cited by eligible studies ( <i>Backward citation tracking</i> )                                                                                                                            |                      |               |
| 11            | 3.1.5          | Search citation indexes ( <i>Forward citation tracking</i> )                                                                                                                                                 |                      |               |
| 12            | 3.2.1          | Search gray literature databases, clinical trial registries, conference proceedings, thesis and dissertation, and other sources of published information about studies                                       |                      |               |
| 13            | 3.2.3          | Invite all study sponsors to submit unpublished data/information, including unreported outcomes, for possible inclusion in the systematic review                                                             |                      |               |
| 14            | 3.2.4          | Hand-search selected journals and conference abstracts                                                                                                                                                       |                      |               |
| 15            | 3.2.5          | Conduct a web search                                                                                                                                                                                         |                      |               |
|               |                | Total (Y+N=T), Y/T x100=Final Score                                                                                                                                                                          |                      |               |
