# Supplementary material
Source: PubMed Central journal article supplement (PMC5079487)
Supplement: 10.3163.1536-5050.104.4.004.sg002.pdf [file 10.3163.1536-5050.104.4.004.sg002.pdf]

## **Impact of librarians on reporting of the literature searching component of pediatric systematic reviews**

*Deborah Meert, MLIS; Nazi Torabi, MLIS; John Costella, DDS, MSc, MLIS*

### **APPENDIX B**

#### **MEDLINE search strategy**

- 1 PEDIATRICS.jn.
- 2 "JOURNAL OF THE AMERICAN ACADEMY OF CHILD & ADOLESCENT PSYCHIATRY".jn.
- 3 JOURNAL OF PEDIATRICS.jn.
- 4 "ARCHIVES OF PEDIATRICS & ADOLESCENT MEDICINE".jn.
- 5 DEVELOPMENTAL DISABILITIES RESEARCH REVIEWS.jn.
- 6 "DEVELOPMENTAL MEDICINE & CHILD NEUROLOGY".jn.
- 7 ARCHIVES OF DISEASE IN CHILDHOOD-FETAL & NEONATAL EDITION".jn.
- 8 JOURNAL OF ADOLESCENT HEALTH.jn.
- 9 PEDIATRIC INFECTIOUS DISEASE JOURNAL.jn.
- 10 "PEDIATRIC ALLERGY & IMMUNOLOGY".jn.
- 11 PEDIATRIC RESEARCH.jn.
- 12 "SEMINARS IN FETAL & NEONATAL MEDICINE".jn.
- 13 PAEDIATRIC RESPIRATORY REVIEWS.jn.
- 14 PEDIATRIC CRITICAL CARE MEDICINE.jn.
- 15 INTERNATIONAL JOURNAL OF PEDIATRIC OBESITY.jn.
- 16 ARCHIVES OF DISEASE IN CHILDHOOD.jn.
- 17 ACADEMIC PEDIATRICS.jn.
- 18 AMBULATORY PEDIATRICS.jn.
- 19 "JOURNAL OF CHILD & ADOLESCENT PSYCHOPHARMACOLOGY".jn.
- 20 SEMINARS IN PERINATOLOGY.jn.
- 21 or/1-20
- 22 (systematic review or systematic literature review).mp.
- 23 (meta-analysis or meta analysis or metaanalysis).mp.
- 24 22 or 23
- 25 21 and 24
- 26 limit 25 to yr="2002-2011"
