# Supplementary material
Source: PubMed Central journal article supplement (PMC5079487)

## Impact of librarians on reporting of the literature searching component of pediatric systematic reviews

Deborah Meert, MLIS; Nazi Torabi, MLIS; John Costella, DDS, MSc, MLIS

**Figure 1**

Flow chart for the selection process

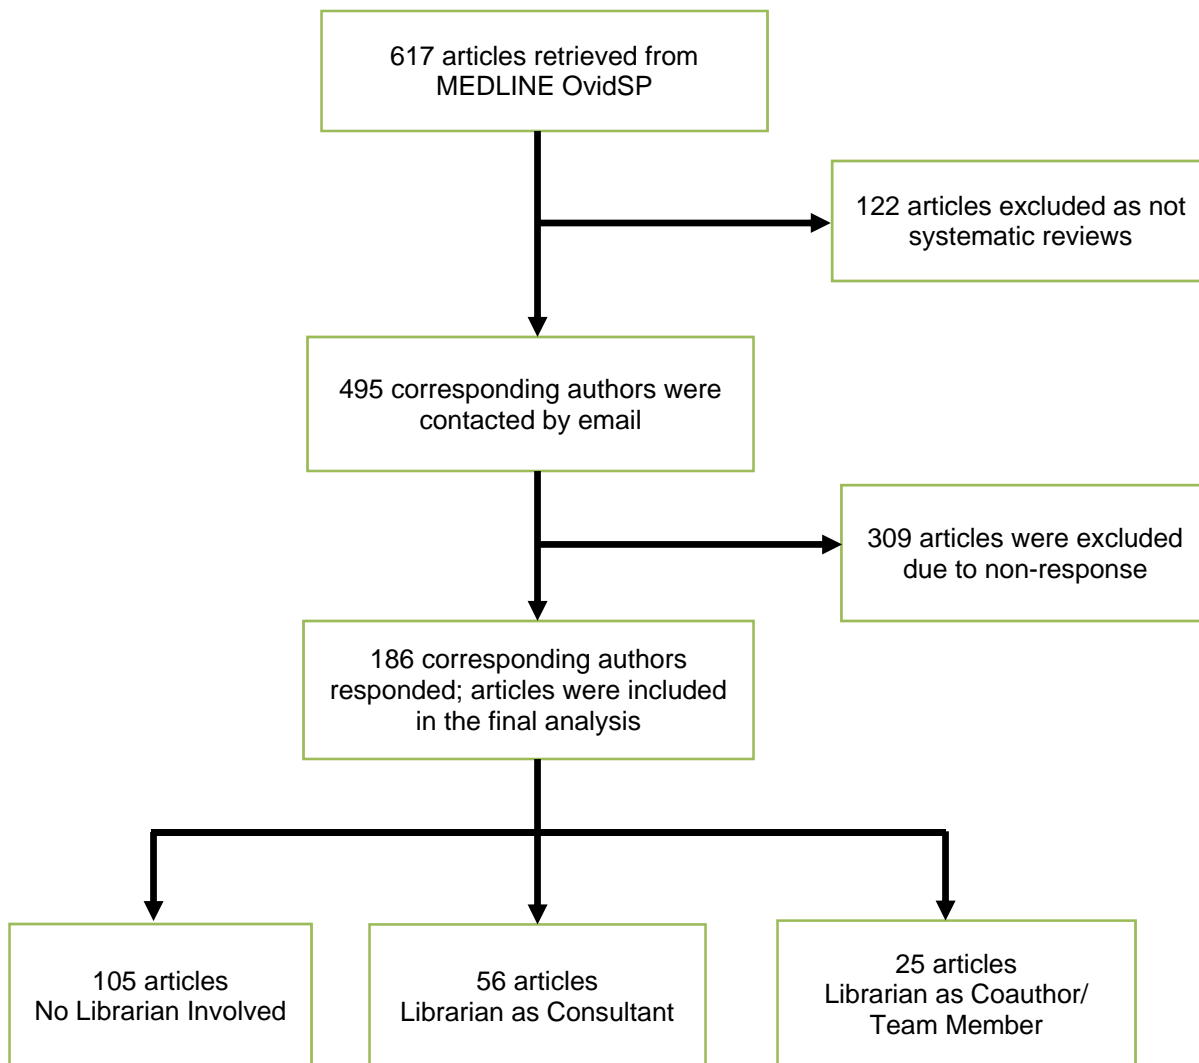

Supplement: 10.3163.1536-5050.104.4.004.sg004.pdf [file 10.3163.1536-5050.104.4.004.sg004.pdf]
