# Supplementary material
Source: PubMed Central journal article supplement (PMC5079487)
Supplement: 10.3163.1536-5050.104.4.004.sg005.pdf [file 10.3163.1536-5050.104.4.004.sg005.pdf]

**Impact of librarians on reporting of the literature searching component of pediatric systematic reviews**

*Deborah Meert, MLIS; Nazi Torabi, MLIS; John Costella, DDS, MSc, MLIS*

**Table 6**

Frequencies of databases reported in each category of systematic reviews

| <b>Number of databases</b>  | <b>Without Librarian</b> | <b>Librarian as Consultant</b> | <b>Librarian as Coauthor/<br/>Team Member</b> |
|-----------------------------|--------------------------|--------------------------------|-----------------------------------------------|
| No database or not reported | 2                        | 2                              | 1                                             |
| 1 database                  | 21                       | 5                              | 0                                             |
| 2 to 5                      | 64                       | 30                             | 13                                            |
| 6 to 9                      | 15                       | 16                             | 3                                             |
| 10 to 18                    | 3                        | 3                              | 8                                             |
| Total                       | 105                      | 56                             | 25                                            |
