# Supplementary material
Source: PubMed Central journal article supplement (PMC5079487)
Supplement: 10.3163.1536-5050.104.4.004.sg006.pdf [file 10.3163.1536-5050.104.4.004.sg006.pdf]

## Impact of librarians on reporting of the literature searching component of pediatric systematic reviews

Deborah Meert, MLIS; Nazi Torabi, MLIS; John Costella, DDS, MSc, MLIS

**Table 8**

Analysis of journal systematic review guidelines

| Title                                                                       | Guideline                                                                                                                                                                                          |
|-----------------------------------------------------------------------------|----------------------------------------------------------------------------------------------------------------------------------------------------------------------------------------------------|
| <i>Pediatrics</i>                                                           | Refers to guidelines @ <a href="http://www.equator-network.org/home/">http://www.equator-network.org/home/</a><br>Recommends use of PRISMA checklist<br>Nothing specific for SRs                   |
| <i>Journal of the American Academy of Child &amp; Adolescent Psychiatry</i> | Nothing specific for SRs                                                                                                                                                                           |
| <i>Journal of Pediatrics</i>                                                | Must submit either PRISMA flow diagram and checklist or MOOSE checklist, depending on nature of the review                                                                                         |
| <i>Archives of Pediatrics &amp; Adolescent Medicine</i>                     | Nothing specific for SRs                                                                                                                                                                           |
| <i>Developmental Disabilities Research Reviews</i>                          | Systematic reviews or meta-analyses: PRISMA                                                                                                                                                        |
| <i>Developmental Medicine &amp; Child Neurology</i>                         | Systematic reviews or meta-analyses following American Academy for Cerebral Palsy and Developmental Medicine (AAPDM) Guidelines: please complete both the PRISMA checklist and the AAPDM checklist |
| <i>Archives of Disease in Childhood-Fetal &amp; Neonatal Edition</i>        | Systematic reviews and meta-analyses: PRISMA guidelines and MOOSE guidelines; also refers to Equator network                                                                                       |
| <i>Journal of Adolescent Health</i>                                         | Nothing specific for SRs                                                                                                                                                                           |
| <i>Pediatric Infectious Disease Journal</i>                                 | Nothing specific for SRs                                                                                                                                                                           |
| <i>Pediatric Allergy &amp; Immunology</i>                                   | Nothing specific for SRs                                                                                                                                                                           |
| <i>Pediatric Research</i>                                                   | Should be formatted according to PRISMA guidelines                                                                                                                                                 |
| <i>Seminars in Fetal &amp; Neonatal Medicine</i>                            | Nothing specific for SRs                                                                                                                                                                           |
| <i>Paediatric Respiratory Reviews</i>                                       | Nothing specific for SRs                                                                                                                                                                           |
| <i>Pediatric Critical Care Medicine</i>                                     | Nothing specific for SRs                                                                                                                                                                           |
| <i>International Journal of Pediatric Obesity</i>                           | Nothing specific for SRs                                                                                                                                                                           |
| <i>Archives of Disease in Childhood</i>                                     | PRISMA guidelines and MOOSE guidelines and refers to EQUATOR Network                                                                                                                               |
| <i>Academic Pediatrics</i>                                                  | PRISMA and MOOSE                                                                                                                                                                                   |
| <i>Ambulatory Pediatrics</i>                                                | Now published as Academic Pediatrics, assume same guidelines apply?                                                                                                                                |
| <i>Journal of Child &amp; Adolescent</i>                                    | Nothing specific for SRs                                                                                                                                                                           |
| <i>Psychopharmacology</i>                                                   |                                                                                                                                                                                                    |
| <i>Seminars in Perinatology</i>                                             | Instructions for authors not available                                                                                                                                                             |

SR=systematic review.
